# Supplementary material for: Computational modeling of the gut microbiota reveals putative metabolic mechanisms of recurrent Clostridioides difficile infection
Source: PLoS Comput Biol. 2021 Feb 22;17(2):e1008782. doi: 10.1371/journal.pcbi.1008782 (PMC7932513; doi:10.1371/journal.pcbi.1008782)
Supplement: S2 Table — (XLSX) [file pcbi.1008782.s002.xlsx]

## Sheet: S2 Table
Table S2. Normalized taxa abundances of 40 stool samples from 14 FMT patients based on data from (55).
Taxa	001_don	001_post	001_pre	002_post1	002_post2	002_pre	003_don	003_post	003_pre	004_post	004_pre	005_post	005_pre	006_post	006_pre	007_don	007_post	007_pre	008_don	008_post	008_pre	009_don	009_post	009_pre	010_don	010_post1	010_post2	010_pre	011_don	011_post	011_pre	012_don	012_post	012_pre	013_don	013_post	013_pre	014_don	014_post	014_pre
Bacteroides	0.323892	0.59481	0.00459082	0.061696	0.683264	0.000137118	0.406524	0.46166	9.77517e-05	0.000534719	0.00122222	0	0	0.558084	0.000129828	0.580307	0.0995924	0.000836021	0.273032	0.272933	0.00564448	0.0147324	0.141895	2.98312e-05	0.501039	0.552764	0.141709	0	0.380601	0.557383	0.0397033	0.20808	0.00174129	0.000500167	0.14258	0.546201	0.000155304	0.296171	0.527425	0.00567293
Cronobacter	7.2998e-05	0.000443557	0.0719894	0.0273694	0.00472222	0.0508707	0.000250941	0.0249012	0.286217	0.170728	0.461556	0.272217	0.429875	0.0582592	0.00791951	0.0044927	0.00285326	0.55882	0.0046581	0.0759497	0.052888	0	0.103668	2.98312e-05	0	0.0176034	0.0155371	0.232544	0	0.0241611	0.00578098	8.93815e-05	0.8199	0.000166722	0.000248484	0.000456308	0.119584	9.91867e-05	0.0530726	0.651017
Lachnospiraceae	0.169136	0.0638723	0.000332668	0.0796797	0.0620833	0.00713012	0.108657	0.0452569	0.000195503	0.14277	0.00133333	0.344667	0.00444339	0.0382326	0.00110354	0.113815	0.311322	0.0111668	0.337119	0.255922	0.220057	0.140267	0.0284427	0.21386	0.110649	0.0755937	0.123761	0.232544	0.166169	0.131544	0.0929319	0.194137	0.0733831	0.000666889	0.282179	0.130048	0.000465911	0.150069	0.111986	0.000586854
Enterobacteriaceae	0.000145996	0	0.359148	0.000525072	0.00152778	0.0409982	0	0.000197628	0.0493646	0.00404858	0.414333	0.0102253	0.0116285	0.00224074	0.861993	0	0	0.234563	0	0	0.0569087	0	0	0.0576636	0.00038961	0	0	0.0039228	0	0	0	0	0.000995025	0.270924	4.96968e-05	0	0.273645	0	0	0.211268
Blautia	0.0478137	0.100022	0.000798403	0.0927409	0.0570139	0.000137118	0.0112923	0.0231225	0.000195503	0.0410969	0.000111111	0.0416493	0	0.0389328	0.000584226	0.0584051	0.207609	0.0352323	0.0421665	0.0411732	0.00100518	0.0404368	0.125512	0.0161983	0.0266234	0.0467131	0.067506	0.0189863	0.0183933	0.0322148	0.415685	0.0529138	0.0159204	0	0.0366763	0.0344513	0.000310607	0.210573	0.0399949	0.000391236
Faecalibacterium	0.0865027	0.0643158	0.000266134	0	0	0	0.0742785	0	0.000195503	7.63884e-05	0	0.00719096	0	0	0.000129828	0.0992138	0.00144928	0.00041801	0.0775132	0.0311173	0.000231965	0.208675	0	0	0.142987	0.0190703	0.0238414	0	0.0941676	0.0711409	0.00970768	0.0281552	0.000248756	0	0.129361	0.0025097	0	0.0974013	0.0294566	0
Peptostreptococcaceae	0.0238704	0.00510091	6.65336e-05	0.000721974	6.94444e-05	0.000685589	0	0.00434783	0.000195503	0.0105416	0.0225556	0.0212819	0.0902387	0.00616203	6.4914e-05	0.00374392	0.00656703	0.0179744	0.0024965	0.00645251	0.195701	0.1022	0.0907891	0.0579619	0.0012987	0.000550105	0.00107152	0.00219677	0.000628832	0.0107383	0.0856239	0.0394172	0.000746269	0.0201734	0.0410496	0.00410678	0.000776518	0.00872843	0.11224	0.0211268
Alistipes	0.0327761	0.0669772	0.000399202	0.00840116	0.0100694	0	0.210038	0.0650198	0	0.0438469	0.000333333	0	0	0.111827	0	0.0205915	0.00330616	0.000119432	0.0236863	0.0139385	0	0.00906609	0.03536	0	0.0249351	0.1968	0.128047	0.227679	0.046848	0.0208054	0	0.123078	0	0	0.0187357	0.026694	0	0.00426503	0	0
Clostridiaceae	0.0604424	0	0.000133067	0.00295353	0.00291667	0.00191965	0.000501882	0.000592885	0	0.00190971	0.0225556	0.00403192	0.249208	0.0356418	0.00032457	0.0123549	4.52899e-05	0.0618058	0.0144005	5.58659e-05	0.135931	0.0862824	0.112133	0.278295	0.00480519	4.58421e-05	0.000267881	0.000627648	0	0.00234899	0.0879145	0.00375402	0.0261194	0.128876	0.00402544	0.000684463	0.000155304	0	0.0275521	0.00978091
Acidaminococcus	0	0	0.000266134	0.38875	0.0538194	0	0	0.233399	0	0.397296	0.000111111	0.0241915	4.72701e-05	0	6.4914e-05	0	0.00013587	0.000119432	0	0	0.000309286	0	0	0	0	0	0	0.00643339	0	0	0	0	0	0	9.93937e-05	0	0	0	0	0
Roseburia	0.0140156	0.0108672	6.65336e-05	6.5634e-05	0.00104167	0.000685589	0.012798	0.0262846	0	0.00893744	0	0.160653	0	0	0.000259656	0.0235867	0	0	0.00538878	0.0371508	0	0.0363159	0.00268499	0.122964	0.0025974	0.000137526	0	0	0.0591102	0.0285235	0.000545375	0.00786557	0	0.000166722	0.0465659	0.0141456	0.000310607	0.0259869	0.00507872	0.000195618
Gammaproteobacteria	0	0	0.368995	0.0500131	0.00951389	0.0259153	0.000250941	0.000988142	0.0792766	0	0.0262222	0.000415662	0.0125739	0.000490162	0.0457644	0	4.52899e-05	0.057566	0	0.0114246	0.245573	0	0	0.00158105	0	0	0	0.00894398	0	0	0.000763525	0	0.0161692	0.177226	0	0.000684463	0.19708	0	0.000380904	0.0342332
Ruminococcaceae	0.0838017	0.0299401	0.000133067	0.00321607	0.00340278	0.000959824	0.00577164	0.0116601	0	0.00160416	0.000111111	0.00644276	0.000567242	0.0616203	0	0.0408087	0.0783062	0.000179147	0.0326372	0.0596089	0	0.0189049	0.108901	0.0355886	0.0128571	0.0297057	0.0369676	0.0026675	0.059739	0.0194631	0.0021815	0.0767787	0.00646766	0.0673558	0.0476593	0.00730094	0	0.0160682	0.00241239	0
Akkermansia	0.000875976	0.00487913	0.000133067	0.0976634	0.0233333	0	0.0138018	0.0205534	0.000684262	0.122527	0	0	4.72701e-05	0.0258385	0	0.0119805	0.0913949	0	0.0142788	0.0146927	0	0.00206047	0.00386821	0	0.00012987	0	0.0867935	0	0.00613111	0.00100671	0	0.000178763	0	0.247916	0	0.119553	0	0	0.000126968	0
Anaerostipes	0.0258413	0	0.000133067	0	0	0	0.0122961	0	0	0	0	0.000872891	0	0	0	0.00187196	0.0817935	0	0.0161968	0.0613966	0	0.0140627	0.000364067	2.98312e-05	0.0701299	0	0.000267881	0.13463	0.0146203	0.0197987	0.0811518	0.0244011	0	0.000166722	0.00740483	0.00159708	0	0.0654632	0.0332656	0
Fusobacterium	7.2998e-05	0.000221779	0.182768	0.0324888	0.0244444	0.456739	0	0.000790514	0	0	0.00966667	0.000249397	0.000756322	0.0156852	6.4914e-05	0	0	0	0	0	0.0267533	5.15119e-05	0	0.0136627	0	0	0.000267881	0	0	0	0	8.93815e-05	0	0.000833611	0	0.000228154	0.119273	0	0	0
Streptococcus	0.00145996	0.00133067	0.00578842	0.0242846	0.0152778	0.00137118	0.000250941	0.0328063	0.259629	0.000381942	0	0.0116385	0.0542189	0.00105035	0.0808828	0.00224635	0.00683877	0.0136152	0.00490166	0.00162011	0.00433001	0.00154536	0.00268499	0.0014319	0.00025974	0.000320895	0.00241093	0.0012553	0.00424462	0.00604027	0.0367583	0.00679299	0.00124378	0.00216739	0.0115794	0.00342231	0.00652275	0.00853005	0.0059675	0.00195618
Erysipelatoclostridium	0.00131396	0.000221779	0	0.00098451	0.0025	0	0.00100376	0.00256917	0	0.0232984	0	0.0117217	0	0.00189062	0	0	0.0114583	5.97158e-05	0.0646959	0.0352514	0	0	0.00131974	0.0406897	0.00012987	0.00600532	0.0182159	0.0564883	0.011319	0.0248322	0.0222513	0.0062567	0.00124378	0	0.0144618	0.00821355	0	0	0.00126968	0
Prevotella	0	0.000221779	0	0	0	0	0	0	0	0	0	0	0	0	6.4914e-05	0	0	0	0	0	0	0.200021	0.0885137	0	0.00012987	0.000137526	0	0	0.000157208	0.000671141	0	0.0502324	0.0136816	0	0	0	0	0	0	0
Subdoligranulum	0	0	0	0	0	0	0.0145546	0	0	0.0152013	0	0	0	0	0	0.0044927	0	0	0.0482555	0.0137989	0	0.0394066	0	0	0.00272727	0.000412579	0.000535762	0	0.0303411	0	0	0.0362889	0	0	0.0848325	0	0	0.0212259	0	0
Parabacteroides	0.0264983	0.0470171	0.000133067	0.00124705	0.0116667	0	0.0333752	0.0264822	0	0	0	0	0	0.03025	0	0	0	0	0	0	0.000154643	0.00896307	0.073678	0	0.0494805	0.0402952	0.00214305	0	0.00267254	0.00369128	0	0.0227029	0.000248756	0	0.00452241	0.00524755	0	0.00813331	0.0201879	0
Lactobacillus	0	0	0	6.5634e-05	0	0.000411353	0	0.000197628	0	0	0.000222222	0.00482168	0.139589	0	0	0	9.05797e-05	0.0011346	0	0	0	0	0	0	0	0	0	0	0	0	0	0	0	0	0	0	0.279236	0	0.000380904	0.047144
Parasutterella	0	0	6.65336e-05	0.109215	0.0161806	0.0925545	0.000250941	0.000988142	0.000879765	0	0	0.062765	0	0.000420139	6.4914e-05	0.0101086	0.000362319	0	0	0	0.000154643	5.15119e-05	0	0	0.0233766	0.000137526	0	0.000941472	0.0138343	0.00738255	0	0.000268144	0	0.00250083	0.000646059	0.000228154	0.000155304	0	0.00418994	0.0021518
Dialister	0	0	6.65336e-05	0.0102389	0	0.0470314	0	0	0	0.00740967	0.0393333	8.31324e-05	0	0	6.4914e-05	0	0	0	0	0	0	0.0157111	0.0487849	0.00193903	0.0116883	4.58421e-05	0	0.00690413	0	0.000671141	0.00818063	8.93815e-05	0	0.000166722	0.0491005	0.0102669	0	0.081829	0.00101574	0
Erysipelotrichaceae	0.0123367	0.000887115	0	0.00124705	0.000416667	0.000137118	0	0.000790514	0	0.00611107	0.000222222	0.00166265	0.00264713	0.00700231	0	0.000374392	0.0682971	0.000955452	0.000182671	0.000307263	0.0167015	0.0236439	0.0122417	0.0442396	0.000909091	0.00738058	0.00589338	0.00988545	0.000314416	0.00167785	0.00196335	0.00437969	0	0.0290097	0.0131697	0.00114077	0.00139773	0.000694307	0.0194261	0.0138889
Enterococcus	0	0	0.00073187	0.00124705	0.000833333	0.0015083	0	0	0.315054	0	0.000111111	4.15662e-05	0.00359253	7.00231e-05	0.000519312	0	0.000181159	0	3.04451e-05	0	0.000618573	0.000103024	0	0.000149156	0	0	0	0	0	0	0.0008726	0	0.000248756	0.0475158	0	0.000228154	0.000155304	0	0	0
Dorea	0.00299292	0.000665336	0	0	0	0	0.00200753	0.00671937	0	0	0	0	0	0	0	0.00411831	0	0	0.020794	0.0267877	7.73216e-05	0.0165868	0.0118322	0	0.00233766	0	0	0	0.00408741	0.00805369	0	0.0138541	0.0216418	0	0.0242024	0	0	0	0.00203149	0
Pseudomonas	0	0	0	0	0	0	0	0	9.77517e-05	0	0	0	0	0.000280092	0	0	0	0	0	0	0	0	0	0.0651214	0.00025974	0	0	0	0	0	0	0	0	0	0	0	0.000621214	0	0	0
Coprococcus	0	0	0	0	0	0	0.0100376	0	0	0	0	0.000124699	0	0	0	0	0	0	0.0157706	0.00374302	0	0.0115902	0	0	0	0	0	0	0.0399308	0	0	0.00125134	0	0	0.030663	0.051791	0	0	0	0
Cloacibacillus	0	0	6.65336e-05	0.00131268	0.00138889	0.254902	0	0	9.77517e-05	0	0	0	0	0.00196065	0	0	0	0	0	0	0	0	0	0	0	0	0	0	0	0	0	0	0	0	0	0.000228154	0	0	0	0
Pasteurellaceae	0	0.000443557	0.000133067	6.5634e-05	0	0	0	0	0	0	0	0.00353313	0	0	0	0	0	0	0	0	0.0345627	0.00257559	0.00027305	0.00739813	0	0	0.000267881	0	0	0.00033557	0.0832243	0.0058098	0	0	0.00273333	0	0	0	0	0
Flavonifractor	0.00532886	0.00177423	0	0.000262536	0.000277778	0.000411353	0.000250941	0.00177866	0	0	0	0.00931083	4.72701e-05	0.00406134	0	0.00748783	0.0283514	0	0.00179626	0.000530726	0	0.000257559	0.00154728	0.00280413	0.00168831	0.00430916	0.00187517	0.0310686	0.00110046	0.00302013	0.000109075	0.00169825	0	0.00316772	0	0.00228154	0	0.00238048	0.000126968	0
Barnesiella	0	0	0	0.000459438	0.0138194	0	0.0567127	0.00869565	0	0	0	0	0	0	0	0	0	0	0	0	0.000541251	0.00448153	0	0	0	0	0	0	0.0455903	0.0244966	0	0.0301216	0	0	0.00655998	0.0273785	0	0	0	0.000586854
Proteus	0	0	0.00279441	0	0	0.0154943	0	0.000197628	0.00782014	0	0	0	0	0	0	0	0	0.00041801	0	0	0	0	0	0.0372889	0.000649351	0	0	0.00078456	0	0	0	0	0	0	0	0	0.000155304	0	0	0
Eubacterium	0.00532886	0.00221779	0	0	0	0	0	0	0	0	0	0	0	0	0	0	0	0	0	0.0339106	0	0	0	0	0.00116883	0	0	0	0	0	0	0.00134072	0	0	0	0	0	0	0	0
Acidaminococcaceae	0	0	0	0	0	0	0.00125471	0	0	0	0	0	0	0	0	0	0	0	0	0	0	0	0	0	0	0.000229211	0.338602	0	0	0	0	0	0	0	0	0	0	0	0.000126968	0
Porphyromonadaceae	0.07548	0.00377024	0	0	0	0	0	0	0	0.000229165	0	0	0	0	0	0	0	0	0	0	0	0	0	0	0	0	0.000535762	0	0	0	0	0	0	0	0	0	0	0	0	0
Ruminococcus	0	0	0	0	0	0	0.0195734	0	0	0	0	0	0	0	0	0	0	0	0	0.00223464	0	0	0.00509693	0	0	0	0	0	0	0	0	0.059975	0	0	0	0	0	0	0	0
Bifidobacterium	0	0	0	0.0030848	0.000416667	0	0.004266	0	0	0.00145138	0	0.000207831	0.000519972	0	0	0	0	0.00501612	0	0	0.00185572	0.00200896	0.000409575	0.00107392	0.00675325	0.001742	0.00348245	0.0214969	0	0	0.024651	0	0	0.000500167	0.000894543	0.000912617	0	0.00238048	0.00228542	0
Normalized Total	1	1	1	1	1	1	1	1	1	1	1	1	1	1	1	1	1	1	1	1	1	1	1	1	1	1	1	1	1	1	1	1	1	1	1	1	1	1	1	1
Unnormalized Total	0.99405	0.993391	1	1	0.999514	1	0.992775	1	1	1	1	1	1	1	1	0.998878	1	1	0.988414	0.986063	1	0.895392	0.993355	1	0.996635	0.995709	0.981852	1	0.989885	0.995324	1	0.920596	1	1	0.995104	1	1	0.991152	0.999492	1
